# Supplementary material for: Can Manipulation of Durum Wheat Amylose Content Reduce the Glycaemic Index of Spaghetti?
Source: PubMed Central journal article supplement (PMC7353610; doi:10.3390/foods9060693), 2020-05-28
Supplement: foods-09-00693-s001.pdf [file foods-09-00693-s001.pdf]

Table S1. Decadal values of temperature and precipitation recorded in the experimental field from November 2015/2016 to June 2016/2017.

| <b>2015-2016</b> |               |                      |                           |                       |  |
|------------------|---------------|----------------------|---------------------------|-----------------------|--|
| <b>Month</b>     | <b>Decade</b> | <b>Rain<br/>(mm)</b> | <b>Temp. Min<br/>(°C)</b> | <b>Temp. Max (°C)</b> |  |
| November         | 1             | 0.2                  | 9.1                       | 20.9                  |  |
| November         | 2             | 0.6                  | 6.6                       | 17.8                  |  |
| November         | 3             | 23.4                 | 3.4                       | 11.7                  |  |
| December         | 1             | 1.2                  | 4.1                       | 13.8                  |  |
| December         | 2             | 0.6                  | 2.6                       | 14.1                  |  |
| December         | 3             | 1.6                  | 1.6                       | 13.5                  |  |
| January          | 1             | 19.4                 | 5.5                       | 12.4                  |  |
| January          | 2             | 27.4                 | -0.5                      | 9.7                   |  |
| January          | 3             | 0.4                  | 2.6                       | 12.5                  |  |
| February         | 1             | 15.0                 | 3.3                       | 14.1                  |  |
| February         | 2             | 43.4                 | 5.5                       | 13.9                  |  |
| February         | 3             | 82.8                 | 4.9                       | 15.1                  |  |
| March            | 1             | 27.4                 | 2.8                       | 12.9                  |  |
| March            | 2             | 2.0                  | 4.4                       | 15.2                  |  |
| March            | 3             | 0.4                  | 5.4                       | 17.7                  |  |
| April            | 1             | 0.0                  | 8.4                       | 22.7                  |  |
| April            | 2             | 1.4                  | 7.5                       | 21.9                  |  |
| April            | 3             | 15.0                 | 7.8                       | 18.6                  |  |
| May              | 1             | 27.6                 | 9.8                       | 21.3                  |  |
| May              | 2             | 38.0                 | 9.7                       | 20.3                  |  |
| May              | 3             | 0.8                  | 10.8                      | 24.4                  |  |
| June             | 1             | 45.8                 | 12.6                      | 24.1                  |  |
| June             | 2             | 0.4                  | 13.3                      | 25.8                  |  |
| June             | 3             | 8.4                  | 17.6                      | 31.8                  |  |
| <b>2016-2017</b> |               |                      |                           |                       |  |
| November         | 1             | 5.0                  | 9.0                       | 17.5                  |  |
| November         | 2             | 44.4                 | 5.6                       | 14.6                  |  |
| November         | 3             | 19.4                 | 5.9                       | 14.9                  |  |
| December         | 1             | 0.0                  | 3.5                       | 13.7                  |  |
| December         | 2             | 5.2                  | 3.5                       | 11.8                  |  |
| December         | 3             | 0.4                  | 1.3                       | 13.1                  |  |
| January          | 1             | 6.8                  | -2.5                      | 6.9                   |  |
| January          | 2             | 18.2                 | -0.4                      | 7.9                   |  |
| January          | 3             | 0.2                  | 1.9                       | 12.1                  |  |
| February         | 1             | 38.6                 | 7.5                       | 12.6                  |  |
| February         | 2             | 4.0                  | 2.2                       | 14.5                  |  |
| February         | 3             | 1.4                  | 3.8                       | 14.8                  |  |
| March            | 1             | 41.2                 | 4.1                       | 15.6                  |  |
| March            | 2             | 0.0                  | 4.1                       | 17.2                  |  |
| March            | 3             | 0.0                  | 5.4                       | 19.9                  |  |
| April            | 1             | 3.6                  | 6.9                       | 20.4                  |  |

|       |   |      |      |      |
|-------|---|------|------|------|
| April | 2 | 2.4  | 6.1  | 19.9 |
| April | 3 | 22.6 | 4.8  | 18.4 |
| May   | 1 | 17.4 | 8.3  | 21.5 |
| May   | 2 | 0.0  | 11.9 | 25.4 |
| May   | 3 | 1.0  | 12.0 | 27.0 |
| June  | 1 | 0.0  | 13.2 | 28.7 |
| June  | 2 | 0.0  | 15.7 | 31.6 |
| June  | 3 | 15.6 | 17.0 | 31.3 |

---
